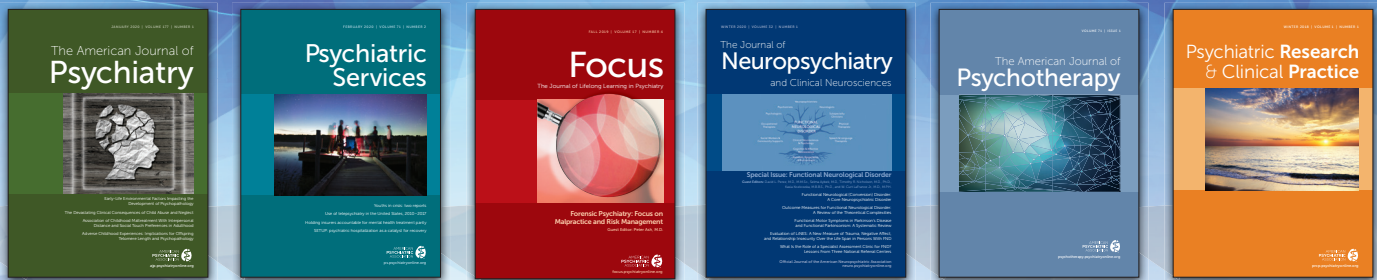

## More Ways to Engage Beyond Reading a Page

The journals of American Psychiatric Association Publishing are leading contributors to the literature. Our articles advance understanding of all aspects of mental and behavioral disorders and their treatment. With close to 10 million page views of journal content annually, APA Publishing's journals reach audiences at more than 2,000 U.S. and international institutions, a figure that includes nearly 100% of U.S. medical schools and hospitals.

APA Publishing is committed to discovery of journal articles and offers several ways to access journal content on the **PsychiatryOnline** knowledge portal, ensuring that practitioners can keep up with the latest findings in the manner they prefer.

### PODCASTS

Each episode brings you an in-depth look at articles featured in that month's issue. Lively discussion and wide-ranging interviews with authors cover the background, rationale, main findings, and future implications of the research.

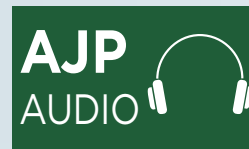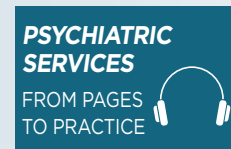

### AUDIO SYNOPSES

Prepared in collaboration with *Psychiatric News*, these audio synopses accompany the online article and can be accessed as a skill through Amazon's Alexa app.

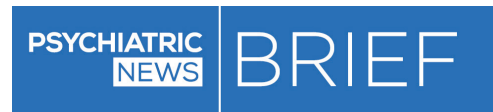

### CURATED COLLECTIONS

These collections of recent and seminal research in a given area can be used as a launch point for authors conducting literature reviews and for educators working on course content. Curated **Editor's Choice** collections from *Psychiatric Services* are currently available.

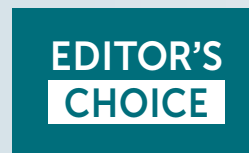

### ALERTS

Keep up with all of the latest research being published by signing up to receive **Publication Alerts** and following on Twitter @APAPubJournals.

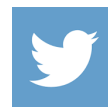

### GET INVOLVED!

We also encourage active contributions to our journals. Submit your research for publication consideration at one of our peer-reviewed titles. Even if you don't have a paper at present, visit our submission site and set up your reviewer account so that you have a say in future contributions to the literature.

[psychiatryonline.org/journals](http://psychiatryonline.org/journals)

Subscribe @ [www.appi.org](http://www.appi.org) • Email: [appi@psych.org](mailto:appi@psych.org) • Toll Free: 1-800-368-5777

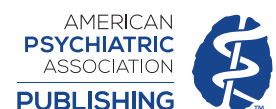

# The American Psychiatric Association Publishing Textbook of Schizophrenia, Second Edition

Edited by Jeffrey A. Lieberman, M.D., T. Scott Stroup, M.D., M.P.H.,  
Diana O. Perkins, M.D., M.P.H., and Lisa B. Dixon, M.D., M.P.H.

**S**chizophrenia is one of the leading causes of disability worldwide and remains among the most challenging and disheartening disorders confronting psychiatrists and other mental health care providers because of its profound effects on patient functioning, its onset just as young adults are launching their lives, and the limitations of current pharmacological treatments.

Designed to bring the reader up to date on the latest research, this new edition represents a complete overhaul of the previous text, with a new structure, new chapters, and new contributors.

Subjects such as genetics and neurobiology, distinguished by rapid advancements in knowledge, are explored in depth, as are new models of service delivery and psychosocial treatments that are making a significant difference in patients' lives. Foundational information on the epidemiology, etiology, and psychopathology of the illness is presented clearly and cogently, emphasizing research conducted over the last decade. Theories regarding the pathophysiological basis of the disorder, including genetic, molecular, and neurocircuitry models, are examined in detail.

Other noteworthy topics include

- Cultural variations, examining how culture influences the presentation of schizophrenia from the perspective of the experts in cultural psychiatry who developed the DSM-5 Cultural Formulation Interview
- Service delivery models, including assertive community treatment, critical time intervention, coordinated specialty care for early psychosis, and integrated dual diagnosis
- Advances in the existing pharmacological treatments, including use of adjunctive medications and combinations of antipsychotics, which, in the absence of new drug therapies, is indispensable knowledge
- A review of the promising field of neuromodulation
- Evaluation and treatment of comorbidities
- Individual- and family-centered care, which presents the rationale and evidence for actively involving patients and family members in interventions and decision-making about treatments

Designed for ease of use, *The American Psychiatric Association Publishing Textbook of Schizophrenia* furnishes evidence-based and cutting-edge knowledge for the next generation of students, trainees, and clinicians.

2020 • 336 pages • ISBN 978-1-61537-172-3 • Hardcover • \$140.00 • Item #37172

2020 • 336 pages • ISBN 978-1-61537-291-1 • eBook • \$112.00 • Item #37291

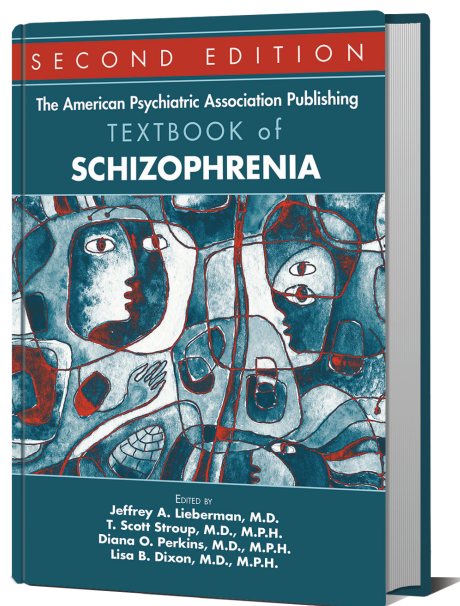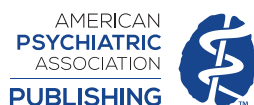

★ 20% Discount for American Psychiatric Association Members  
25% Discount for APA Resident-Fellow Members

ORDER @ [www.appi.org](http://www.appi.org) | Email: [appi@psych.org](mailto:appi@psych.org) | Toll Free: 1-800-368-5777
